# Supplementary material
Source: PubMed Central journal article supplement (PMC2836057)

**Supplementary Table 1. Thermostability analyses of calreticulin constructs from SYPRO****Orange binding assays.**

Indicated mCRT constructs (left column) were incubated with the fluorophore SYPRO Orange and subjected to a thermal stability analysis using a realtime PCR machine. Proteins (16  $\mu$ M) were incubated alone (Protein), with 48  $\mu$ M G1M3 (Protein + G1M3), or with 3 mM ATP (Protein + ATP). Each condition was analyzed in triplicate within an experiment. For each experiment, mean % maximum fluorescence values from triplicate wells were plotted as a function of temperature, and  $T_m$  values were estimated as the temperatures at which 50% of the maximum fluorescence was observed.  $T_m$  values shown are the averaged  $T_m$  values from n independent experiments for each condition, SEM represents the standard error of the estimated mean  $T_m$  values.

| Constructs        | Protein          |     |   | Protein + G1M3   |     |   | Protein + ATP    |     |   |
|-------------------|------------------|-----|---|------------------|-----|---|------------------|-----|---|
|                   | $T_m$            | SEM | n | $T_m$            | SEM | n | $T_m$            | SEM | n |
| mCRT(WT)          | 47.96 $\pm$ 0.21 |     | 5 | 51.08 $\pm$ 0.18 |     | 5 | 46.24 $\pm$ 0.02 |     | 2 |
| mCRT( $\Delta$ C) | 44.29 $\pm$ 0.44 |     | 3 | 46.91 $\pm$ 0.17 |     | 3 | ---              |     |   |
| mCRT( $\Delta$ P) | 47.63 $\pm$ 0.07 |     | 3 | 51.00 $\pm$ 0.27 |     | 3 | 45.49 $\pm$ 0.13 |     | 2 |
| mCRT(Y92A)        | 45.90 $\pm$ 0.31 |     | 2 | 46.23 $\pm$ 0.28 |     | 2 | ---              |     |   |
| mCRT(W244A)       | 46.59 $\pm$ 0.46 |     | 2 | 50.74 $\pm$ 0.03 |     | 2 | ---              |     |   |
| mCRT(Y92AW244A)   | 42.96 $\pm$ 0.55 |     | 2 | 43.82 $\pm$ 0.01 |     | 2 | ---              |     |   |
| mCRT(W302A)       | 44.82 $\pm$ 0.55 |     | 3 | 45.67 $\pm$ 0.55 |     | 3 | ---              |     |   |

## Supplementary Figure Legends

### **Supplementary Fig 1. Structural model for calreticulin and depiction of truncation mutants and glycan-binding site.**

**(A)** A model for the calreticulin structure was obtained from Modbase (Pieper et al., 2004), and the PyMOL Molecular Graphics System (<http://www.pymol.org>) was used to render the structures. Calreticulin residues 1-32 are depicted in green. The C-terminal helix is depicted in light blue, and the core calreticulin structure is shown in orange. The P-domain is depicted in dark blue. The C-terminal acidic domain is not included in the model. **(B)** Putative glycan-binding residues of calreticulin are highlighted in purple, and the region of the calreticulin model corresponding to the glycan binding site is boxed. Mutagenesis studies (Gopalakrishnapai et al., 2006; Kapoor et al., 2003) have implicated highlighted residues (purple) in glycan binding.

### **Supplementary Fig 2. Calreticulin is required for the stabilization of the MHC class I –**

**tapasin interaction within the peptide loading complex.** The indicated cell lines were lysed in a digitonin lysis buffer. A rabbit anti-calreticulin antibody was used for the immunoprecipitation; lysates and samples were immunoblotted with goat anti-calreticulin, hamster anti-tapasin, or rabbit anti-ERp57 and anti-MHC class I antibodies. No antibody (No Ab) controls were performed by incubating indicated lysates with beads, and Buffer (Buf) indicates signals obtained with antibody alone (without lysates). NS indicates non-specific bands.

### **Supplementary Fig 3. Relative aggregation suppression activities of full-length and C-**

**terminal truncation mutants of mCRT under various conditions.** **(A-D)** Representative SDS-PAGE gels of aggregation assays with indicated mCRT constructs and OVA as a control.

Ovalbumin or mCRT at indicated concentrations were incubated with 4  $\mu$ M LLO in the presence of 0.2-0.5 mM CaCl<sub>2</sub> or 5 mM EDTA at 37 °C for 1 hour. Following incubations, aggregated proteins were separated from soluble proteins by centrifugation, and proteins present in supernatants (S) and pellets (P) were resolved by SDS-PAGE and visualized by staining with coomassie blue dye. **(E and F)** Band intensities of LLO in the pellet after incubation in the presence of mCRT or OVA were quantified, and are represented as a percentage relative to LLO observed in the pellet in the absence of mCRT or OVA. For each condition, data represent results from 3 or more experiments, except under conditions of 16  $\mu$ M mCRT<sub>1-362</sub>, for which data represent quantifications from 2 experiments.

### Supplementary references

- Gopalakrishnapai, J., G. Gupta, T. Karthikeyan, S. Sinha, E. Kandiah, E. Gemma, S. Oscarson, and A. Surolia. 2006. Isothermal titration calorimetric study defines the substrate binding residues of calreticulin. *Biochem Biophys Res Commun.* 351:14-20.
- Kapoor, M., H. Srinivas, E. Kandiah, E. Gemma, L. Ellgaard, S. Oscarson, A. Helenius, and A. Surolia. 2003. Interactions of substrate with calreticulin, an endoplasmic reticulum chaperone. *J Biol Chem.* 278:6194-200.
- Pieper, U., N. Eswar, H. Braberg, M.S. Madhusudhan, F.P. Davis, A.C. Stuart, N. Mirkovic, A. Rossi, M.A. Marti-Renom, A. Fiser, B. Webb, D. Greenblatt, C.C. Huang, T.E. Ferrin, and A. Sali. 2004. MODBASE, a database of annotated comparative protein structure models, and associated resources. *Nucleic Acids Res.* 32:D217-22.

Supplementary Figure 1

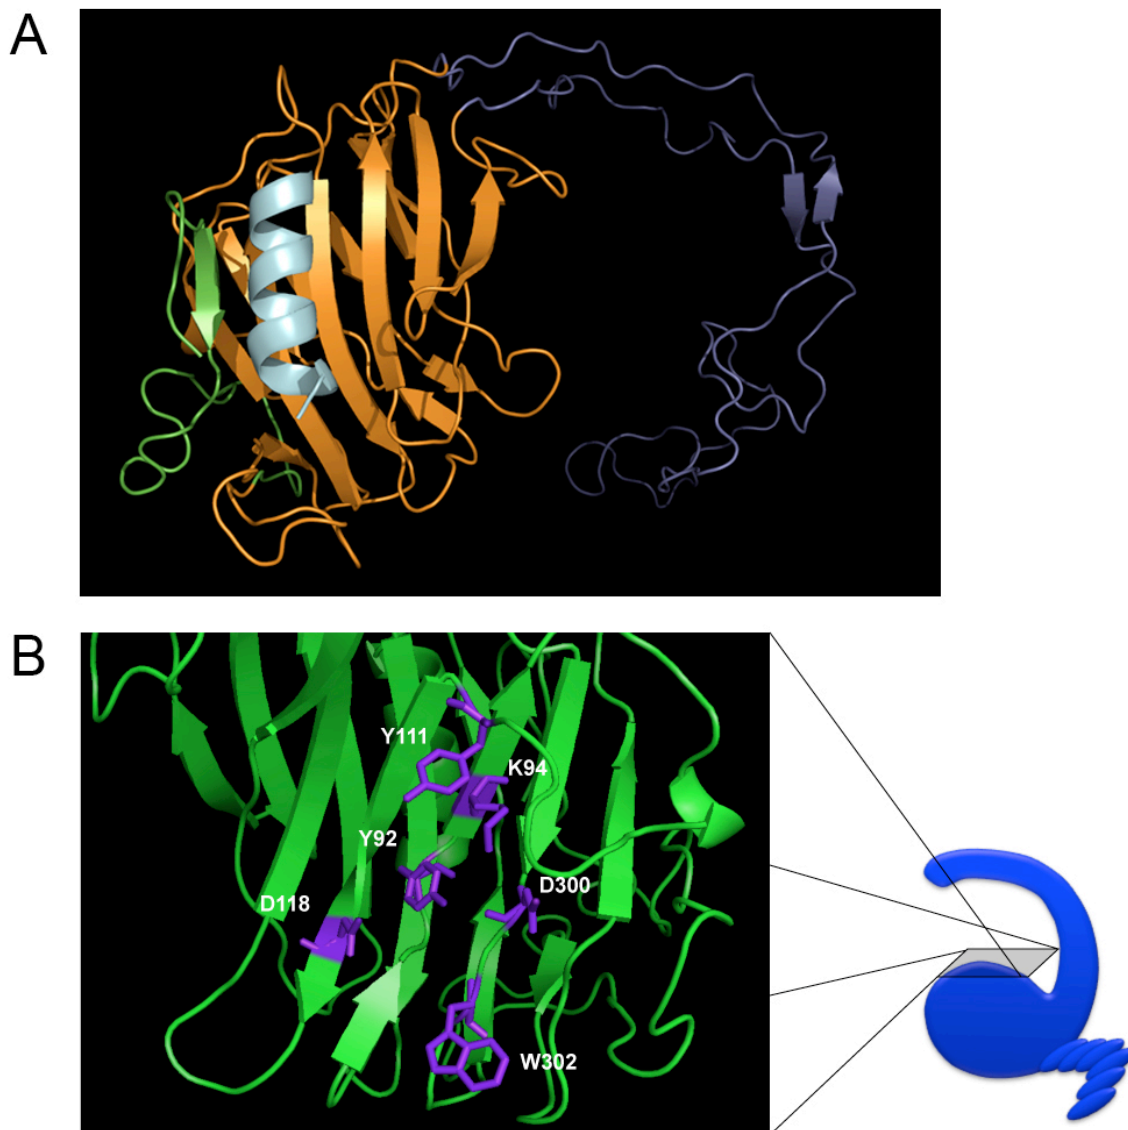



### Supplementary Figure 3

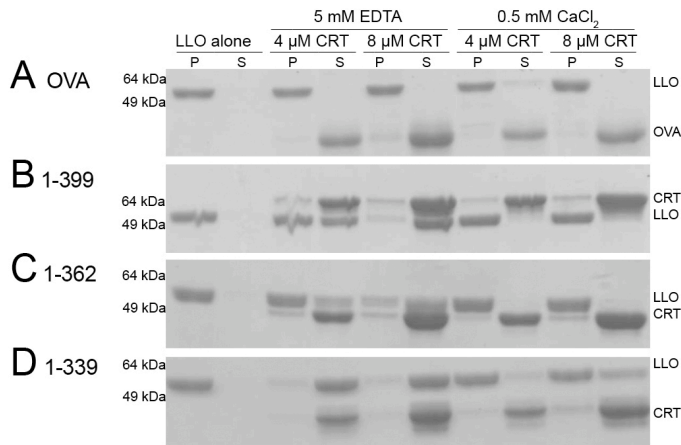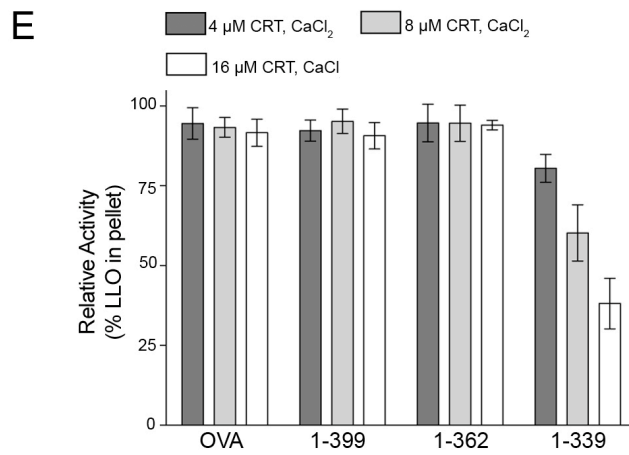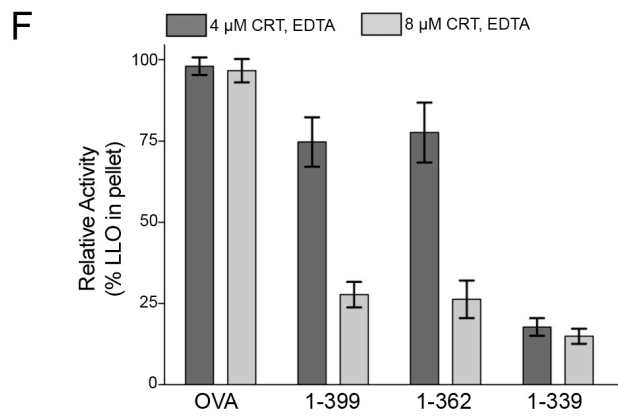

Supplement: supp_M109.085407_jbc.M109.085407-1.pdf [file supp_M109.085407_jbc.M109.085407-1.pdf]
